# Supplementary material
Source: PubMed Central journal article supplement (PMC5513864)

SUPPORTING INFORMATION:

**Legends:**

**Figure S1** Cyclic AMP concentration-response curves showing 3HA-hCB<sub>1</sub> HEK cell signalling on stimulation with vehicle or 2.5µM FSK, following pre-treatment in the presence of increasing concentrations of the CB<sub>1</sub> irreversible antagonist AM6544. Representative data. Curves were created by area-under-the-curve analysis of kinetic CAMYEL biosensor data which was normalised to basal (0%) and FSK (100%).

Figure S1:

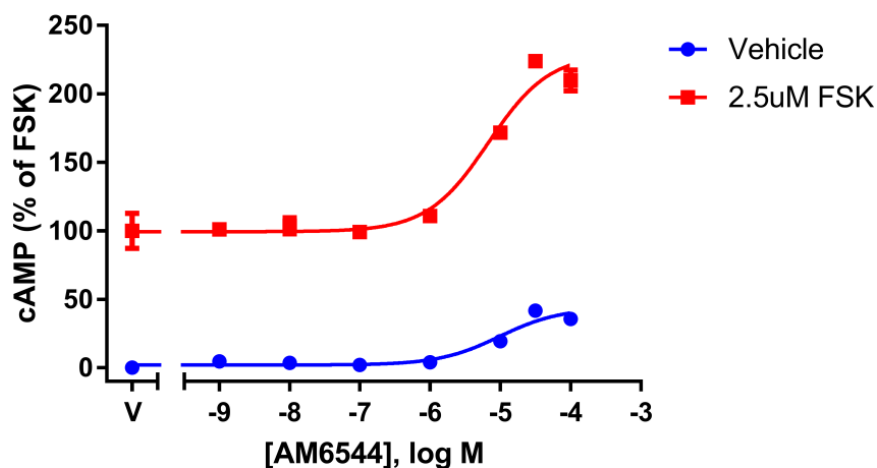

Supplement: BPH-174-2545-s001.pdf [file BPH-174-2545-s001.pdf]
